# Supplementary material for: Mesenchymal niche remodeling impairs hematopoiesis via stanniocalcin 1 in acute myeloid leukemia
Source: JCI journal article supplement (doi:10.1172/jci133187), 2020-05-03
Supplement: sd1 [file 1]

## Supplementary Figures

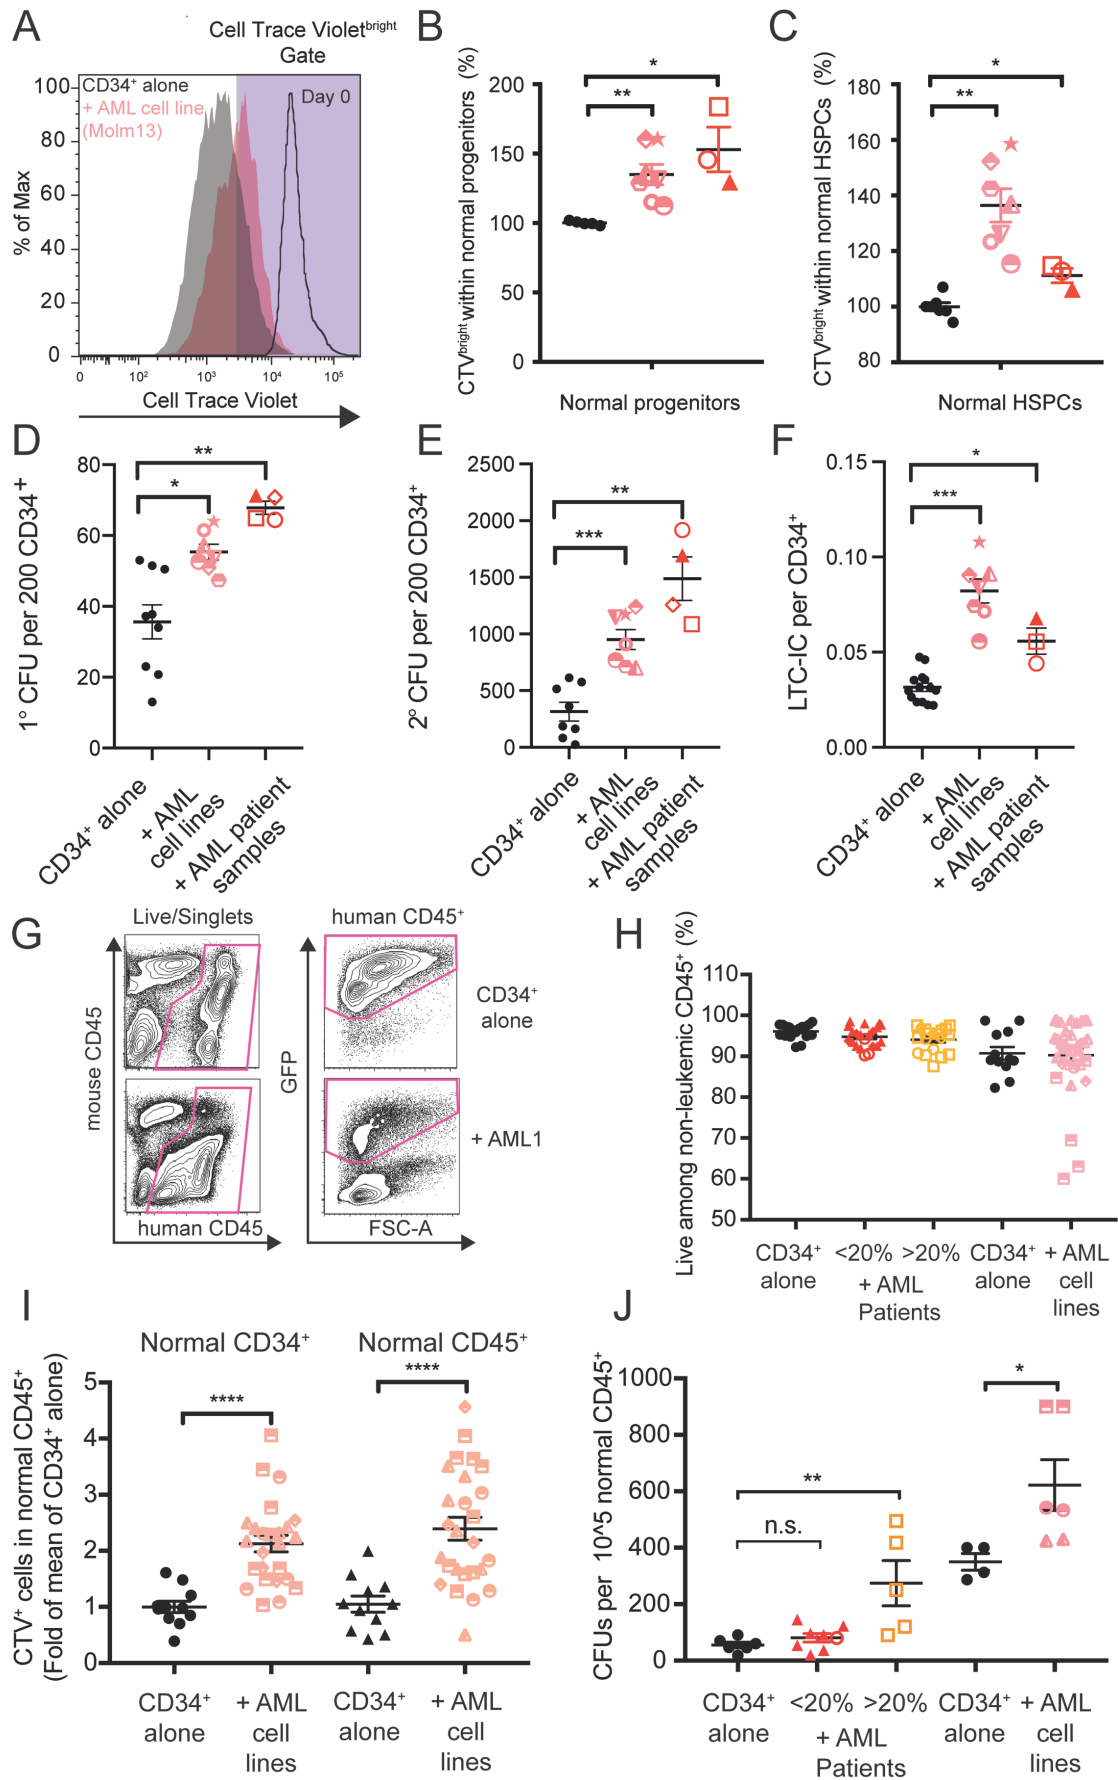

**Supplementary Figure 1. (A-F)** CD34<sup>+</sup> cells co-cultured with MSCs alone (CD34<sup>+</sup> alone) (n=4-7), + AML cell lines (n=7) or primary samples (n = 3-4). After 4 days of co-culture, CD34<sup>+</sup> cells were plated for CFU or LTC-IC assays. **(A)** Representative flow cytometry plot of CD34<sup>+</sup> cells before and after co-culture with MSCs alone or + AML cell line MOLM-13 and gating strategy to analyze the proliferation based on Cell Trace Violet (CTV) retention. **(B-C)** Quantification of CTV<sup>bright</sup> retaining cells among normal progenitors (CD34<sup>+</sup>CD38<sup>+</sup>) **(B)** and HSPCs (CD34<sup>+</sup>CD38<sup>-</sup>) **(C)** from CD34<sup>+</sup> co-cultured with MSC alone or AML cell lines (n=7) and patient samples. AML1-4. **(D-F)** Sorted CD34<sup>+</sup> cells after 4 days co-culture with MSCs alone, or with AML cell lines (n=3-7) or AML patient samples (n=3) were plated for CFU or LTC-IC assays or implanted into NSG mice. AML patients: AML1-3 **(D)** Primary and **(E)** secondary CFU results per 200 CD34<sup>+</sup> cells. **(F)** Frequency of LTC-IC. **(G)** Flow cytometry gating strategy to identify human hematopoietic engraftment and distinguish normal from leukemic cells from CD34<sup>+</sup> alone (top) and + AML patient scaffolds (bottom), respectively. **(H)** Percentage of viable non-leukemic human CD45<sup>+</sup> cells per scaffold. AML1-5. 12-35 scaffolds in 5-9 mice/group **(I)** Quantification of CTV<sup>+</sup> cells among normal HSPCs (CD34<sup>+</sup>) and non-leukemic human CD45<sup>+</sup> from scaffolds of CD34<sup>+</sup> alone (n=7) or + AML cell lines (n=4). 12-27 scaffolds in 6-9 mice/group **(J)** Primary colony forming ability of non-leukemic FACS-sorted cells from CD34<sup>+</sup> alone or + AML scaffolds. AML cell lines (n=3) and AML patients (n=4)

Each symbol represents an AML cell line/patient sample and data is presented as mean ± SEM.. n.s. non-significant, \*P < 0.05; \*\*P < 0.01; \*\*\*P < 0.001, \*\*\*\*P < 0.0001 by Mann-Whitney test **(B-F, I)** and Krustal-Wallis with Dunn's **(J)**.

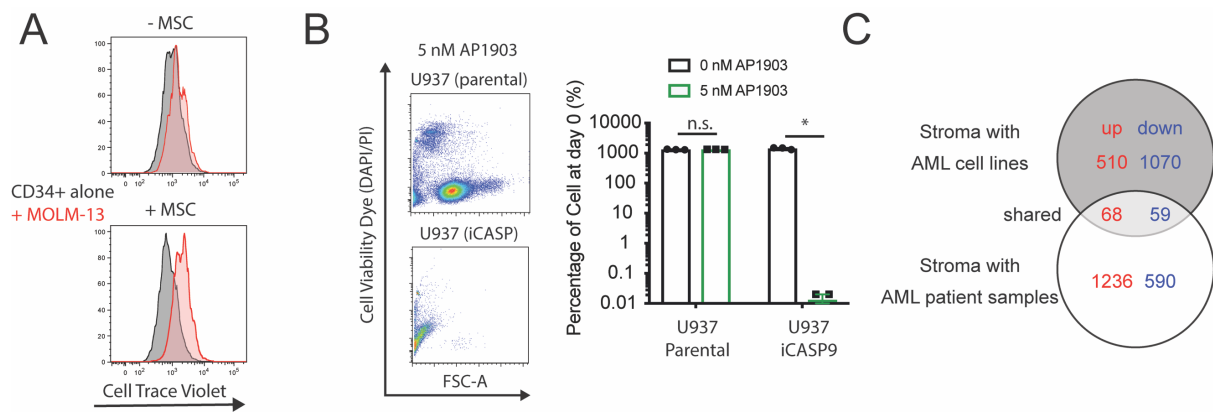

**Supplementary Figure 2 (A)** CD34<sup>+</sup> cells were cultured alone or with AML cell lines (n=4) with (+ MSC) and without (-MSC) MSCs. Representative flow cytometry plots with CD34<sup>+</sup> alone (grey) and + MOLM-13 (red). **(B)** Parental and iCASP9 AML cell lines were exposed for 4 days to AP1903 or vehicle. (Left panel) Flow cytometry plot of parental and iCASP9 AML cell line U937. (Right panel) Cell count normalized to day 0. **(C)** Differentially up- or downregulated genes with log fold-change (LogFC) <-1 or >1 in MS-5 with AML cell lines, or AML patient samples or shared between both groups. Data is presented as mean ± SEM of n=3. n.s. non-significant, \*P < 0.05; \*\*P < 0.01; \*\*\*P < 0.001, \*\*\*\*P < 0.0001 by 2-tailed Student T-test

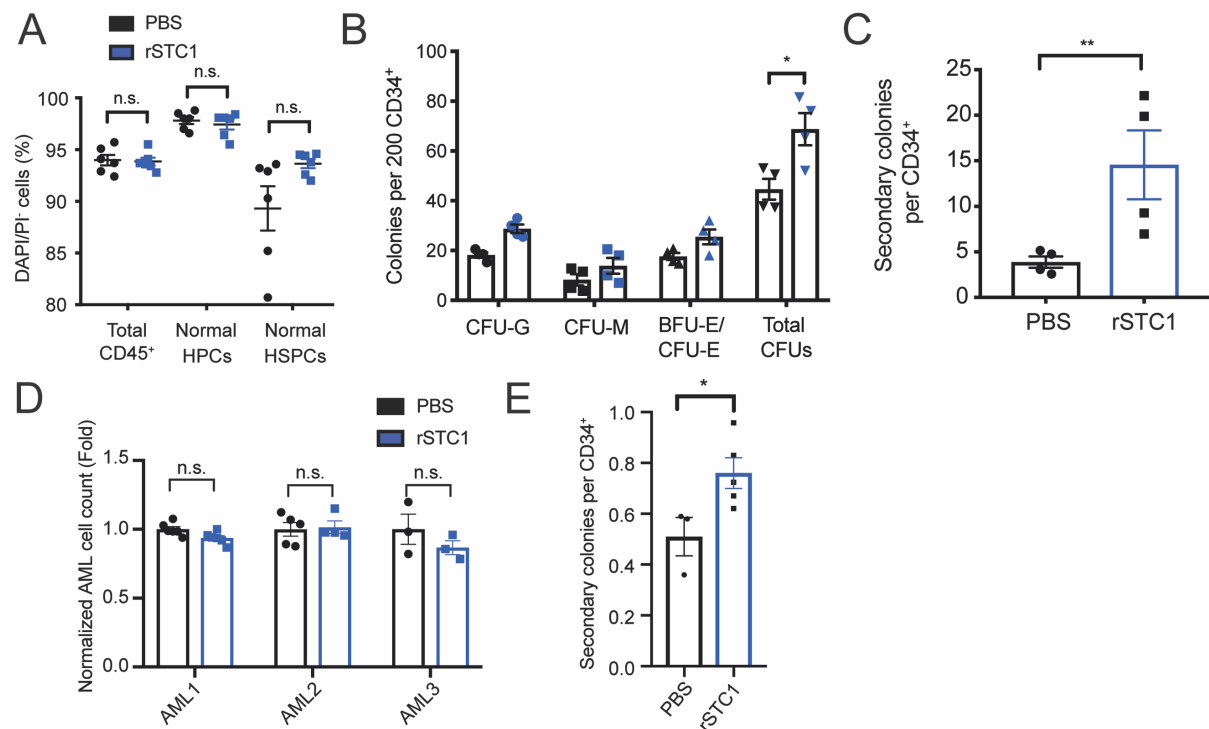

**Supplementary Figure 3 (A-D)** Normal CB CD34<sup>+</sup> or AML patient samples were co-cultured on MSCs and either PBS or rSTC1 was added for 5 days. **(A)** Quantification of viable DAPI<sup>-</sup>/PI<sup>-</sup> cells **(B-C)** Normal CD34<sup>+</sup> cells were sorted after 5 days and plated for CFC assay **(B)** Primary CFUs per 200 CD34<sup>+</sup> cells; **(C)** Total secondary CFUs. **(D)** Total leukemic cell count normalized to PBS control. **(E)** Normal BM CD34<sup>+</sup> co-cultured on MSCs and either PBS or rSTC1 was added for 5 days. Secondary CFUs per CD34<sup>+</sup> in BM CD34<sup>+</sup>.

Data is presented as mean ± SEM of n=3-6. n.s. non-significant, \*P < 0.05; \*\*P < 0.01;

\*\*\*P < 0.001, \*\*\*\*P < 0.0001 by 2-tailed student t-test

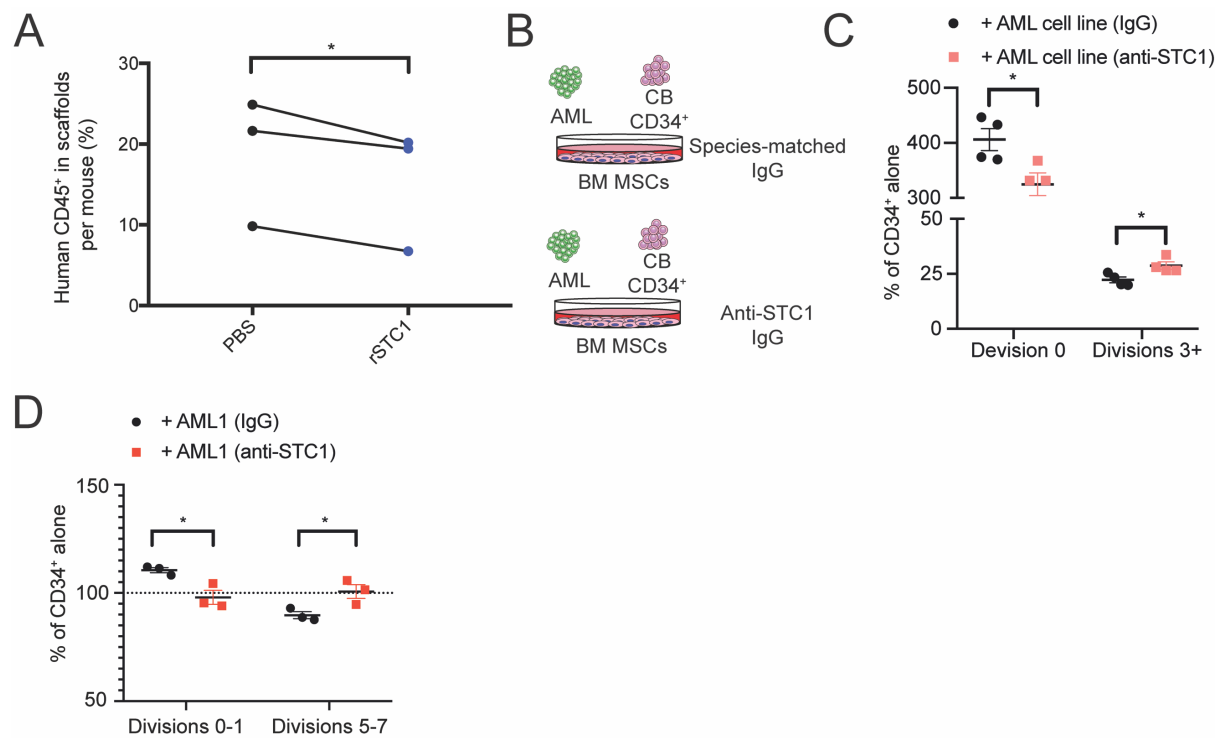

**Supplementary Figure 4 (A)** MSC scaffolds with normal CD34<sup>+</sup> were implanted into NSG-S mice. rSTC1 was injected every other day for 10 days. Engraftment of human CD45<sup>+</sup> cells in scaffolds per mouse. Paired 2-tailed Student T-test. **(B-D)** CD34<sup>+</sup> cells were co-cultured with MSCs alone or + AML cell line U937 (C) or + AML1 (D) and supplemented with Anti-STC1 antibody or species-matched IgG. **(C-D)** Proportions of cells undergone n divisions relative to CD34<sup>+</sup> alone.

Data is presented as mean  $\pm$  SEM of n=3-4 n.s. non-significant, \*P < 0.05; \*\*P < 0.01;

\*\*\*P < 0.001, \*\*\*\*P < 0.0001 by 2-tailed student t-test

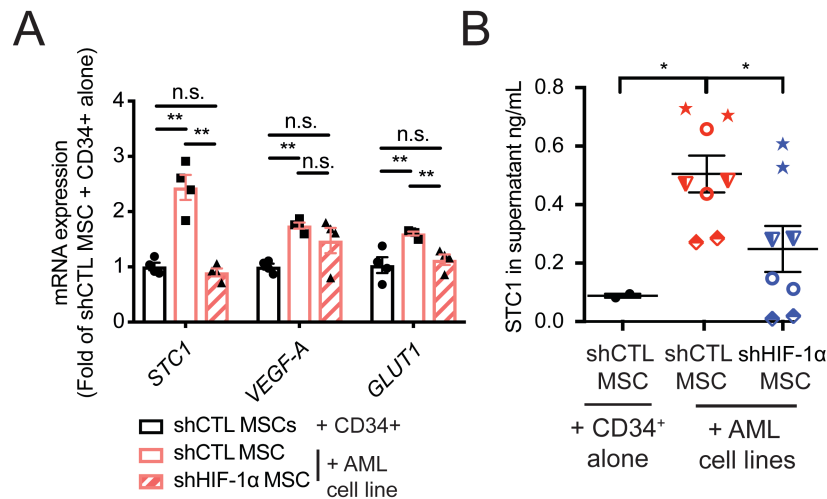

**Supplementary Figure 5 (A-B)** MSCs were lentivirally transduced to express shRNA against RFP (shCTL) or shHIF-1 $\alpha$  (shHIF-1 $\alpha$ ) construct. **(A)** mRNA expression of hypoxia regulated genes in MSCs after co-culture with CB CD34<sup>+</sup> (n=4) or AML cell line U937 (n=4) and normalized to shCTL-MSC + CD34<sup>+</sup> alone. **(B)** STC1 secretion in supernatant of MSCs + CD34<sup>+</sup> alone (n=4) or + AML cell lines (n=4). Data is presented as mean  $\pm$  SEM n.s. non-significant, \*P < 0.05; \*\*P < 0.01; \*\*\*P < 0.001, \*\*\*\*P < 0.0001 by ANOVA with Tukey test **(A)** and Friedman test with Dunn's test **(B)**.

## **Supplementary Materials and Methods**

### **Lentivirus transduction**

#### **MSC**

MSCs were seeded at  $2.5 \times 10^4/\text{cm}^2$  in a 12-well dish in 400  $\mu\text{L}$  of media at a multiplicity of infection (MOI) of 10 and incubated at  $37^\circ \text{C}$ . After 16h the virus is removed and the MSCs are trypsinized and seeded. All co-cultured and scaffolds were started 4 days after MSC transduction. Transduction efficiency was generally  $>80\%$ .

#### **HSPCs**

$\text{CD}34^+$  HSPCs were resuspended at  $0.2\text{-}0.5 \times 10^6/\text{mL}$  Stem span SFEM II (StemCell Technologies, Vancouver, Canada) containing SCF 100 ng/ml, Flt3L 100 ng/ml, IL6 10 ng/ml, IL3 10 ng/ml, G-CSF 25 ng/ml (all cytokines from Peprotech, London, UK) and 100 U/ml P/S and pre-stimulated for 8h before adding lentivirus at MOI of 30. After 16h the cells are washed with PBS and resuspended in Stem span SFEM II containing SCF 300 ng/ml, Flt3L 300 ng/ml and TPO 20 ng/ml. After another 2 days the  $\text{GFP}^+$  HSPCs were FACS-sorted.

### **Generation of Lentivirus vectors**

The generation and validation of lentivirus vector against HIF-1 $\alpha$  (Sh-HIF1) is described in our previous publication (20). Briefly, H1-shRNA sequences were subcloned in the lentivirus (pTrip $\Delta\text{U}3\text{Ef}1\alpha\text{-EGFPMCS}\Delta\text{U}3$ ) that contains the enhanced GFP (eGFP) gene under the control of the EF1 $\alpha$  promoter. An shRNA directed against the dsRed fluorescent protein (RFP) was used as a control (shCTL).

Lentivirus vectors against STC1 were purchased from vectorbuilder based on U6-shRNA sequences with eGFP selection marker. As control an shRNA directed against LacZ was used. shRNA sequences are listed in **Table S2**.

### **Generation of AML expressing inducible caspase 9 fragment**

A plasmid with the MSCV.IRES.GFP retrovirus backbone expressing a product of FKBP1A fused with a Ser-Gly-Gly-Gly-Ser linker to the small and large subunit of the caspase 9 gene (originally deposited by David Spencer) was obtained from Addgene. Retrovirus production was carried out identically to the lentivirus production with the exception that retrovirus packaging constructs pHIT60 (expressing gag-pol) and pVSV-g (expressing VSV-G) were used (both a generous gift from Jonathan Stoye). AML cell lines were transduced at MOI 10 and sorted four days after based on GFP<sup>+</sup> expression (named AML iCasp9).

### **Colony forming unit assay**

To perform colony forming unit assays, CD34<sup>+</sup> cells were plated in the methylcellulose media MethoCult H4434 (StemCell Technologies, Vancouver, Canada). Colonies were scored according to their morphology 14 days following plating using an inverted microscope. Colonies were harvested by washing with PBS and re-plated in secondary assays for an additional 14 days.

### **Long term colony initiation cell – Assay (LTC-IC)**

As a feeder-layer MS-5 were seeded at  $2 \times 10^4/\text{cm}^2$  on day 0 in a 12-well dish. On day 2 the plate was irradiated at 7.5 grey. 4,000 CD34<sup>+</sup> HSPCs are suspended in 1 ml of Myelocult H5100 (Stem cell technologies, Vancouver, Canada). The media from the irradiated feeder-layer plate is removed and replaced with 1 ml of the HSPC



suspension per well. 500 µl of media was replaced per week. After 5 /6 weeks, all cells are collected and FACS sorted using a surface marker staining for human CD45 and murine SCA-1 to discriminate MS-5 (Sca-1<sup>+</sup>CD45<sup>-</sup>) and hematopoietic cells (Sca-1<sup>-</sup>CD45<sup>+</sup>).  $2.2 \times 10^4$  hematopoietic cells were resuspended in 1.1 ml of methylcellulose (Methocult H4434 Stem Cell Technologies, Vancouver, Canada) containing SCF, GM-CSF, IL3 and EPO at manufacturer's concentration. One ml of the suspension was transferred to one of the 6 inner wells of a 12-well dish. The outer wells were filled with dH<sub>2</sub>O to prevent the methylcellulose from drying. Colonies are scored after 14 days. The number of colonies from  $2 \times 10^4$  cells was used to calculate the total number of colonies from the progeny of 4,000 HSPCs. The total colony number was then divided by the average colony output per LTC-IC which determines the number of LTC-IC per 4,000 HSPCs.

### **Flow cytometry analysis and cell sorting**

Flow cytometry analysis was performed using a LSRII flow cytometer and LSRFortessa (BD Biosciences, Oxford, UK). Transduced cells were identified based on their GFP expression or via HLA.A2 (mismatched between UCB and primary patient samples used). Mouse Human CD73 and CD90 was used to label primary MSC. Sorting was performed on either MoFlo XDP (Beckman Coulter), BD FACS Aria or BD Influx sorters using a 100 µm nozzle. Collection tubes contained 2% FCS/PBS and purity checks were performed to check sort quality. Human grafts in mice were assessed using hCD45, hCD3, hCD19, hCD33, hCD34, hCD38, hCD45RA, hCD90, hCD49f and mouse CD45 antibodies (see table supplementary S2).

### **Reverse Transcriptase and Real Time Quantitative PCR (RT-QPCR)**

The direct-zol RNA purification kit (Zymo Research) was used for samples  $<1 \times 10^5$  cells and the RNeasy Mini kit (Qiagen RNeas, Crawley, UK) for samples between  $1 \times 10^5$  -  $1 \times 10^7$  cells according to the manufacturer's instructions. mRNA was reverse transcribed by Superscript III Reverse Transcriptase (Invitrogen) with an oligoDT primer (Sigma-Aldrich, Gillingham, Dorset, UK). RT-QPCR was performed on a QuantStudio™ 5/7 (Applied Biosystems) using the standard manufacturer's settings and mRNA expression was quantified with the Comparative CT Method and Ribosomal Protein L18A (RPL18A) (MSC) were used as housekeeping gene controls. The CT values used were the result of triplicates. The primers used are described in **Table Supplementary S4**.

### **Western blotting**

Cells were lysed in RIPA buffer containing a protease and phosphatase inhibitor cocktail (all from Sigma, Dorset, UK). The protein concentration was measured with a Lowry protein assay (DC Protein Assay from BioRad). Total protein extracts (20-30  $\mu\text{g}$ ) were mixed with 4x Nupage Loading buffer (ThermoFisher Scientific, UK) and boiled at  $96^\circ \text{C}$  for 5 min. The samples were run on a denaturing precast 8-12 % bis-tris Nupage gel (ThermoFisher Scientific, UK) and transferred by wet transfer to nitrocellulose membranes. Primary antibodies were incubated ON at  $4^\circ \text{C}$  and secondary antibodies 1h at RT. Protein bands were visualized using an enhanced chemiluminescence visualization system (ECL Plus, Amersham Life Sciences).

**Table Supplementary S1 - Primary AML patient cells used**

| <b>AML ID</b> | <b>Karyotype</b>            | <b>FAB</b>   | <b>NPM</b> | <b>FLT3</b> | <b>Risk Group</b> |
|---------------|-----------------------------|--------------|------------|-------------|-------------------|
| AML5          | Normal                      | Bi-phenotype | n.d.       | ITD         | intermediate      |
| AML1          | T(6;11)(Q27;Q23)            | M5A          | n.d.       | n.d.        | n.d.              |
| AML2          | Trisomy 8,21                | n.d.         | n.d.       | n.d.        | poor              |
| AML3          | Trisomy 13                  | M1           | Mut        | n.d.        | n.d.              |
| AML4          | 1q                          | M5A          | Mut        | WT          | n.d.              |
| AML6          | Complex                     | n.d.         | n.d.       | n.d.        | poor              |
| AML7          | Normal                      | M2           | Mut        | WT          | intermediate      |
| AML8          | Normal                      | M1           | Mut        | ITD         | intermediate      |
| AML9          | 5q-                         | n.d.         | n.d.       | n.d.        | poor              |
| AML10         | Inv(3)(Q21Q26)/t(8;13)(p21) | M0           | n.d.       | n.d.        | n.d.              |
| AML11         | Normal                      | M1           | n.d.       | n.d.        | n.d.              |
| AML12         | t(6;9)                      | M2           | WT         | ITD         | poor              |
| AML13         | 46,XX,t(6;9)(p23;q34)       | M4           | WT         | ITD         | poor              |

n.d. Not determined

Table Supplementary S2 – Primary AML patient plasma used

## AML at diagnosis

| Patient ID | WBC x10 <sup>9</sup> /L | PLT x 10 <sup>9</sup> /L | Neut x 10 <sup>9</sup> /L | HCT   | FLT3 (ITD) | FLT3 (ITD) VAF | RUNX1 | IDH1 | IDH2 | NPM | Plasma Origin |
|------------|-------------------------|--------------------------|---------------------------|-------|------------|----------------|-------|------|------|-----|---------------|
| AML14      | 0.8                     | 118                      | 0.3                       | 0.31  | No         |                | ND    | No   | No   | No  | BM            |
| AML15      | 1.3                     | 24                       | 0.12                      | 0.237 | Yes        | 0.548          | ND    | No   | No   | No  | BM            |
| AML16      | 2.8                     | 28                       | 0.8                       | 0.256 | Yes        | 3.311          | ND    | ND   | No   | No  | BM            |
| AML17      | 0.5                     | 51                       | 0.07                      | 0.199 | No         |                | ND    | Yes  | No   | Yes | BM            |
| AML18      | 10.9                    | 40                       | 5.53                      | 0.332 | No         |                | ND    | No   | No   | Yes | BM            |
| AML19      | 144.8                   | 78                       | 1.33                      | 0.231 | Yes        | 0.49           | ND    | No   | No   | No  | BM + PB       |
| AML20      | 70.3                    | 31                       | 49.6                      | 0.242 | ND         |                | ND    | ND   | ND   | ND  | BM + PB       |
| AML21      | 18.3                    | 57                       | 4.26                      | 0.214 | No         |                | Yes   | No   | No   | No  | BM + PB       |
| AML22      | 26                      | 30                       | 0.26                      | 0.332 | No         |                | ND    | No   | No   | Yes | BM + PB       |
| AML23      | 0.8                     | 24                       | ND                        | 0.222 | No         |                | ND    | No   | No   | No  | BM            |
| AML24      | 0.4                     | 91                       | 0.12                      | 0.302 | No         |                | ND    | Yes  | No   | No  | BM            |
| AML25      | 12.3                    | 23                       | 1.86                      | 0.226 | failed     |                | ND    | Yes  | No   | Yes | BM            |
| AML26      | 12.8                    | 30                       | 5.43                      | 0.235 | Yes        | 0.36           | Yes   | No   | No   | No  | BM            |
| AML27      | 9.1                     | 169                      | 1.98                      | 0.353 | No         |                | ND    | No   | Yes  | No  | BM            |
| AML28      | 1.5                     | 33                       | 0.22                      | 0.249 | No         |                | ND    | Yes  | No   | No  | BM            |
| AML29      | 12.8                    | 21                       | 0.06                      | 0.301 | No         |                | Yes   | No   | No   | No  | BM + PB       |
| AML30      | 1.2                     | 118                      | 0.43                      | 0.287 | No         |                | ND    | No   | No   | No  | PB            |
| AML31      | 84.3                    | 22                       | ND                        | 0.206 | Yes        | 0.363          | Yes   | No   | No   | No  | BM + PB       |
| AML32      | 0.6                     | 175                      | 0.31                      | 0.306 | No         |                | Yes   | No   | No   | No  | BM + PB       |
| AML33      | 48.9                    | 18                       | 0.24                      | 0.256 | No         |                | ND    | No   | No   | No  | BM + PB       |

|       |       |     |       |       |     |       |     |     |     |     |         |
|-------|-------|-----|-------|-------|-----|-------|-----|-----|-----|-----|---------|
| AML34 | 180   | 25  | 10.08 | 0.218 | Yes | 0.87  | ND  | No  | No  | Yes | BM + PB |
| AML35 | 39.5  | 6   | 0.59  | 0.239 | Yes | 0.67  | Yes | No  | No  | No  | BM + PB |
| AML36 | 2.3   | 11  | 0.01  | 0.26  | No  |       | ND  | No  | Yes | No  | PB      |
| AML37 | 18.7  | 39  | 6.05  | 0.295 | Yes | 0.471 | ND  | No  | No  | No  | PB      |
| AML38 | 1.9   | 83  | ND    | 0.22  | No  |       | ND  | Yes | No  | Yes | PB      |
| AML39 | 27.5  | 25  | 0.81  | 0.211 | Yes | 0.33  | Yes | No  | No  | No  | PB      |
| AML40 | 148.1 | 17  | 4.59  | 0.178 | Yes | 0.04  | ND  | No  | No  | Yes | PB      |
| AML41 | 34    | 11  | 8.08  | 0.209 | No  |       | ND  | No  | No  | No  | PB      |
| AML42 | 22.4  | 146 | ND    | 0.308 | No  |       | ND  | No  | No  | No  | PB      |
| AML43 | 88.2  | 24  | ND    | 0.26  | Yes | 0.28  | ND  | No  | No  | No  | PB      |
| AML44 | 60.2  | 25  | ND    | 0.157 | No  |       | ND  | No  | Yes | No  | PB      |
| AML45 | 88.4  | 45  | 16.27 | 0.234 | No  |       | ND  | No  | Yes | No  | PB      |
| AML46 | 48.6  | 36  | 1.22  | 0.255 | Yes | 0.75  | ND  | No  | Yes | No  | BM + PB |
| AML47 | 37.3  | 69  | 2.05  | 0.248 | No  |       | Yes | No  | No  | No  | PB      |
| AML48 | 43.6  | 16  | 4.05  | 0.337 | No  |       | No  | No  | No  | No  | PB      |

## Paired samples

| Patient ID | WBC x10 <sup>9</sup> /L | PLT x 10 <sup>9</sup> /L | Neut x 10 <sup>9</sup> /L | HCT   | FLT3 (ITD) | FLT3 (ITD) VAF | RUNX1 | IDH1 | IDH2 | NPM | Plasma Origin |
|------------|-------------------------|--------------------------|---------------------------|-------|------------|----------------|-------|------|------|-----|---------------|
| AML65-D    | 60.5                    | 98                       | 0.3                       | 0.345 | No         |                | ND    | No   | No   | No  | BM + PB       |
| AML65-R    | 36.1                    | 535                      | 22.82                     | 0.207 |            |                |       |      |      |     | BM            |
| AML66-D    | 5.5                     | 22                       | 2.47                      | 0.198 | Yes        | 0.418          | ND    | No   | No   | Yes | BM            |
| AML66-R    | 7.5                     | 401                      | 4.99                      | 0.336 |            |                |       |      |      |     | BM            |
| AML67-D    | 39.5                    | 61                       | 1.34                      | 0.217 | Yes        | 0.498          | ND    | No   | No   | No  | BM + PB       |
| AML67-R    | 7.3                     | 181                      | 3.89                      | 0.215 |            |                |       |      |      |     | BM            |
| AML68-D    | 2.5                     | 31                       | 1.32                      | 0.229 | No         |                | Yes   | No   | No   | No  | BM            |

|         |      |     |       |       |    |  |    |    |    |    |    |
|---------|------|-----|-------|-------|----|--|----|----|----|----|----|
| AML68-R | 12.4 | 97  | 10.63 | 0.354 |    |  |    |    |    |    | BM |
| AML69-D | 0.7  | 12  | ND    | 0.201 | No |  | ND | No | No | No | BM |
| AML69-R | 2.7  | 302 | 1.53  | 0.306 |    |  |    |    |    |    | BM |

## AML in remission

| Patient ID | WBC x10 <sup>9</sup> /L (4 - 10) | PLT x 10 <sup>9</sup> /L (150 - 410) | Neut x 10 <sup>9</sup> /L (2 - 7) | HCT   | Plasma Origin |
|------------|----------------------------------|--------------------------------------|-----------------------------------|-------|---------------|
| AML49      | 4.6                              | 245                                  | 2.11                              | 0.394 | BM            |
| AML50      | 4                                | 169                                  | 2.41                              | 0.503 | BM            |
| AML51      | 5.6                              | 163                                  | 4.11                              | 0.373 | BM            |
| AML52      | 3.6                              | 219                                  | 2.01                              | 0.353 | BM            |
| AML53      | 3.2                              | 280                                  | 1.29                              | 0.343 | BM            |
| AML54      | 4.5                              | 189                                  | 3.71                              | 0.278 | BM            |
| AML55      | 7.8                              | 218                                  | 5.31                              | 0.273 | BM            |
| AML56      | 4.7                              | 130                                  | 1.96                              | 0.412 | BM            |
| AML57      | 2.3                              | 109                                  | 1.19                              | 0.274 | BM            |
| AML58      | 5.6                              | 112                                  | 4.12                              | 0.394 | BM            |
| AML59      | 2.7                              | 214                                  | 1.02                              | 0.375 | BM            |
| AML60      | 4.9                              | 215                                  | 3.22                              | 0.381 | BM            |
| AML61      | 3.3                              | 117                                  | 1.74                              | 0.311 | BM            |
| AML62      | 7.9                              | 276                                  | 5.53                              | 0.217 | BM            |
| AML63      | 3.8                              | 281                                  | 1.3                               | 0.327 | BM            |
| AML64      | 9                                | 153                                  | ND                                | 0.258 | BM            |

**Table Supplementary S3 - Antibodies**

| <b>Antigen</b>   | <b>Species</b> | <b>Clone</b>      | <b>Manufacturer</b> | <b>Catalogue number</b> |
|------------------|----------------|-------------------|---------------------|-------------------------|
| $\beta$ -Actin   | Human          | AC-15             | Sigma               | A1978                   |
| CD135            | Human          | 4G8               | BD                  | 583494                  |
| CD19             | Human          | HIB19             | BD                  | 555412                  |
| CD3              | Human          | UCHT1             | BD                  | 555333                  |
| CD33             | Human          | WM53              | BD                  | 551378                  |
| CD34             | Human          | 4H11              | eBioscience         | 25-0349-42              |
| CD34             | Human          | 8G12              | BD                  | 347222                  |
| CD34             | Human          | 581               | BD                  | 555824                  |
| CD38             | Human          | HB7               | eBioscience         | 25-0388-42              |
| CD45             | Human          | HI30              | eBioscience         | 25-0459-42              |
| CD45             | Mouse          | 30-F11            | eBioscience         | 45-0451-82              |
| CD45RA           | Human          | HI100             | eBioscience         | 47-0458-42              |
| CD49f            | Human          | GoH3              | BD                  | 555736                  |
| CD51             | Mouse          | RMV-7             | eBioscience         | 12-0512-83              |
| CD73             | Human          | AD2               | BD                  | 563199                  |
| CD90             | Human          | eBio5E10          | eBioscience         | 17-0909-42              |
| HIF-1a           | Human          | 54/HIF-1 $\alpha$ | BD                  | 610959                  |
| HLA-A2           | Human          | BB7.2             | BD                  | 558570                  |
| Ki67             | Human          | 20RAJ1            | eBioscience         | 50-5699-82              |
| Lineage cocktail | Human          | mixed             | BD                  | 340546                  |
| STC1             | Human          | N-15              | Santa Cruz          | sc-14346                |
| STC1             | Human          |                   | Biovendor           | RD181095100             |

**Table Supplementary S4 - shRNA sequences**

| <b>Target</b> | <b>Sequence</b>                                 |
|---------------|-------------------------------------------------|
| shCTL(dsRed)  | GCTCCAAGGTGTACGTGAATTCAAGAGATTCACGTACACCTTGGAGC |

|                  |                                                     |
|------------------|-----------------------------------------------------|
| ShHIF-1 $\alpha$ | GATGTTAGCTCCCTATATCCCTTCAAGAGAGGGATATAGGGAGCTAACATC |
|------------------|-----------------------------------------------------|

**Table Supplementary S5 - RT-PCR primer sequences**

| Gene           | Species | 5' sequence             | 3' sequence            |
|----------------|---------|-------------------------|------------------------|
| <i>STC-1</i>   | Human   | TGAGGCGGAGCAGAATGACT    | CAGGTGGAGTTTTCCAGGCAT  |
| <i>STC-2</i>   | Human   | GGTGGACAGAACCAAGCTCTC   | CGTTTGGGTGGCTCTTGCTA   |
| <i>VEGF-A</i>  | Human   | ATGAACTTTCTGCTGTCTTGGGT | TGGCCTTGGTGAGGTTTGATCC |
| <i>RPL18A</i>  | Human   | GGAGAGCACGCCATGAAG      | AAGATTCGCATGCGGTAGAG   |
| <i>IGF-BP1</i> | Human   | TCAAAAAATGGAAGGAGCCCT   | AATCCATTCTTGTTGCAGTTT  |
| <i>IGF-BP2</i> | Human   | CACCGGCACATGGGCAA       | GAAGGCGCATGGTGGAGAT    |
| <i>PDK1</i>    | Human   | CGGATCAGAAACCGACACA     | ACTGAACATTCTGGCTGGTGA  |
| <i>GLUT1</i>   | Human   | AACTCTTCAGCCAGGGTCCAC   | CACAGTGAAGATGATGAAGAC  |
